# Supplementary material
Source: MDPI journal article supplement (https://www.mdpi.com/2076-3417/13/3/1494)
Supplement: s1 [file s1]

# End-of-Life Impact on the Cradle-to-Grave LCA of Light-Duty Commercial Vehicles in Europe

Antonella Accardo <sup>1,\*</sup>, Giovanni Dotelli <sup>2</sup>, Federico Miretti <sup>1</sup>, and Ezio Spessa <sup>1</sup>

<sup>1</sup> Dipartimento Energia “Galileo Ferraris”, CARS@Polito, Politecnico di Torino, c.so Duca Degli Abruzzi 24, 10129 Torino, Italy; federico.miretti@polito.it (F.M.); ezio.spessa@polito.it (E.S.)

<sup>2</sup> Dipartimento di Chimica, Materiali e Ingegneria Chimica “Giulio Natta”, Politecnico di Milano, p.zza Leonardo da Vinci 32, 20133 Milano, Italy; giovanni.dotelli@polimi.it

\* Correspondence: antonella.accardo@polito.it

**Abstract:** A cradle-to-grave life cycle assessment focused on end-of-life (EoL) was conducted in this study for three configurations of a light-duty commercial vehicle (LDCV): diesel, compressed natural gas (CNG), and battery electric vehicle (BEV). The aim is to investigate the impact of recycling under two EoL scenarios with different allocation methods. The first is based on the traditional avoided burden method, while the second is based on the circular footprint formula (CFF) developed by the European Commission. For each configuration, a detailed multilevel waste management scheme was developed in compliance with the 2000/53/CE directive and ISO22628 standard. The results showed that the global warming potential (GWP) impact under the CFF method is significantly greater when compared to the avoided burden method because of the A-parameter, which allocates the burdens and benefits between the two connected product systems. Furthermore, in all configurations and scenarios, the benefits due to the avoided production of virgin materials compensate for the recycling burdens within GWP impact. The main drivers of GWP reduction are steel recycling for all of the considered LDCVs, platinum, palladium, and rhodium recycling for the diesel and CNG configurations, and Li-ion battery recycling for the BEV configuration. Finally, the EoL stage significantly reduces the environmental impact of those categories other than GWP.

**Keywords:** waste management treatment of vehicles; end-of-life (EoL) of vehicles; life cycle assessment (LCA); light duty commercial vehicles; avoided burden approach; circular footprint formula; ELVS

**Table S1** Compositions of the ELVs

| Materials/Components                                                 | DIE-ICEV<br>(kg) | CNG-ICEV<br>(kg) | BEV (kg) |
|----------------------------------------------------------------------|------------------|------------------|----------|
| Steel                                                                | 1720             | 1724             | 1471     |
| Light alloys (e.g., Aluminium, Magnesium)                            | 21               | 8                | 48       |
| Heavy metals (e.g., Copper, Zinc, Lead, Nickel)                      | 40               | 34               | 74       |
| Other metals (e.g., Tin, Silver, Gold)                               | 0.2              | 0.1              | 0.4      |
| Polymers (e.g., Thermoplastics, Elastomers, Polyester, Polyurethane) | 227              | 205              | 302      |
| Textiles and organic materials                                       | 11               | 8                | 12       |
| Glass                                                                | 66               | 65               | 50       |
| Other materials and material compounds (e.g., Brass)                 | 4.7              | 4.8              | 38       |
| Electronics                                                          | 1.8              | 2.3              | 15.6     |
| Fuels and auxiliary means                                            | 7.7              | 7.7              | 7.8      |
| Components (e.g., Steering wheel, Sensors, Engine, Electric Motor)   | 564              | 750              | 245      |
| Lead acid battery                                                    | 22               | 22               | 22       |

|                                                           |      |      |      |
|-----------------------------------------------------------|------|------|------|
| Exhaust components (DOC/DPF, sensors, Three-way catalyst) | 14.8 | 14.3 | 0    |
| Electric powertrain (w/o battery)                         | 0    | 0    | 137  |
| Li-ion NMC111 battery                                     | 0    | 0    | 452  |
| Total                                                     | 2700 | 2845 | 2876 |

**Table S2** Assumed fates

| <b>Depollution</b>                        |                                                |                                                                         |
|-------------------------------------------|------------------------------------------------|-------------------------------------------------------------------------|
| Air bags                                  | Reused                                         | No Ecoinvent recycling pathway available so it was assumed to be reused |
| Oils                                      | Involved in clinker production                 | From Ecoinvent                                                          |
| Fuels                                     | Reused                                         |                                                                         |
| Other fluids (e.g., brake fluid, coolant) | Reused                                         | No Ecoinvent recycling pathway available so it was assumed to be reused |
| Water                                     | Wastewater treatment                           | From Ecoinvent.                                                         |
| Li-ion NMC battery                        | Treatment of the Li-ion NMC battery            | Details in [45].                                                        |
| Lead Acid Battery                         | Treatment of scrap Lead in Lead acid battery   | 95% recycled (from Annex C PEF e-mobility batteries), 5% landfilled.    |
| CNG tanks                                 | Treatment of metal components                  | 64% recycled, 36% reused (From [48]).                                   |
| <b>Dismantling</b>                        |                                                |                                                                         |
| 30% of the total amount of plastics       | Treatment of plastics and elastomers           | 86% recycled, 9% reused, 5% landfilled                                  |
| Electric and Electronic equipment         | Treatment of electric and electronic equipment | Manual dismantled, 87% recycled and 13% landfilled.                     |
| Steel and Aluminium components            | Treatment of metal components                  | 64% recycled, 36% reused (From [48]).                                   |
| Plastics components                       | Treatment of plastic components                | 85% recycled, 15% reused (From [48]).                                   |
| Other components (e.g., sensors, cables)  | Reused                                         |                                                                         |
| Tires                                     | Treatment of tires                             | 31% incinerated, 64% recycled, 5% reused (From [48]).                   |
| Exhaust system                            | Underground disposal                           | 100% landfilled.                                                        |
| Platinum/Rhodium/Palladium                | Treatment of Platinum/Rhodium/Palladium        | Following [49], in the European Automotive sector the 50% is recycled.  |
| BEV powertrain                            | Treatment of electric and electronic equipment | Manual dismantled, 87% recycled and 13% landfilled.                     |
| Glass                                     | Recycling of Glass                             | 85% recycled, 9% reused (From [48]).                                    |
| Mixed metals                              | Treatment of mixed metals                      | 80% recycled, 20% landfilled.                                           |
| Magnesium alloys                          | Recycling of Magnesium                         | 100% recycled.                                                          |
| Electronic scrap from control unit        | Treatment of electric and electronic equipment | Manual dismantled, 87% recycled and 13% landfilled.                     |
| <b>Shredding and post-shredding</b>       |                                                |                                                                         |

|                             |                                       |                                  |
|-----------------------------|---------------------------------------|----------------------------------|
| Steel                       | Recycling of Steel                    | 100% recycled.                   |
| Aluminium                   | Recycling of Aluminium                | 100% recycled.                   |
| Nickel alloys               | Recycling of Nickel                   | 100% recycled.                   |
| Lead                        | Recycling of Lead                     | 100% recycled.                   |
| Copper                      | Recycling of Copper                   | 100% recycled.                   |
| Lacquers                    | Incineration of non-ferrous materials | 100% incinerated.                |
| ASR polymeric fraction      | Recycling of PP as proxy              | 100% recycled.                   |
| ASR metallic fraction       | Recycling of Steel as proxy           | 100% recycled.                   |
| ASR non identified fraction |                                       | 65% incinerated, 35% landfilled. |

Table S3 Life Cycle Inventory of the three ELVs EoL scenario

| Avoided products            | DIE-ICEV<br>(kg/vehicle) | CNG-ICEV<br>(kg/vehicle) | BEV (kg/vehicle) |                                                  |
|-----------------------------|--------------------------|--------------------------|------------------|--------------------------------------------------|
| Steel low-alloyed           | 1430                     | 1390                     | 1220             | Recycled from Shredding and Post-shredding stage |
| Steel low-alloyed           | 274                      | 256                      | 135              | Recycled and Reused from metal components        |
| Aluminium cast alloy        | 17                       | 6                        | 39               | Recycled from Shredding stage                    |
| Aluminium cast alloy        | 177                      | 382                      | 0.5              | Recycled and Reused from metal components        |
| Nickel                      | 0.02                     | 0.01                     | 3.63             | Recycled from Shredding stage                    |
| Lead                        | 11                       | 11                       | 11               | Recycled from Shredding stage                    |
| Copper                      | 24                       | 18                       | 75               | Recycled from Shredding stage                    |
| Polypropylene granulate     | 62                       | 55                       | 81               | Recycled and Reused from Dismantling stage       |
| Polypropylene granulate     | 151                      | 135                      | 198              | Recycled from Post-shredding stage               |
| Polypropylene granulate     | 32.2                     | 31                       | 20               | Recycled and Reused from plastic components      |
| Glass                       | 50                       | 49                       | 36               | Recycled                                         |
| Reused components           | 39                       | 42                       | 42               | Reused                                           |
| Steel low-alloyed           | 3.5                      | 3.5                      | 3.5              | Recycled from tires                              |
| Synthetic rubber            | 20                       | 20                       | 20               | Recycled from tires                              |
| Nylon 6-6                   | 0.5                      | 0.5                      | 0.5              | Recycled from tires                              |
| Polyethylene terephthalate  | 1.0                      | 1.0                      | 1.0              | Recycled from tires                              |
| Magnesium alloys            | 0.6                      | 1.0                      | 1.0              | Recycled                                         |
| Platinum/Rhodium/Palladium  | 0.02                     | 0.03                     | -                | Recycled                                         |
| Polypropylene granulate     | 0.4                      | 0.3                      | 19               | Recycled from electric and electronics equipment |
| Aluminium cast alloy        | 0.8                      | 0.5                      | 37               | Recycled from electric and electronics equipment |
| Copper                      | 0.4                      | 0.3                      | 17               | Recycled from electric and electronics equipment |
| Steel low-alloyed           | 1.3                      | 0.9                      | 58               | Recycled from electric and electronics equipment |
| Other metals                | 0.13                     | 0.11                     | 0.30             | Recycled                                         |
| Lead from Lead Acid Battery | 13.2                     | 13.2                     | 13.2             | Lead recycled in Lead Acid Battery               |
| Li-ion NMC battery          | -                        | -                        | 407              | Recycled                                         |
| <b>Waste to treatment</b>   |                          |                          |                  |                                                  |
| Steel recycling             | 1363                     | 1318                     | 1148             | Recycling of Steel from shredding stage          |

|                                   |      |      |      |                                                                              |
|-----------------------------------|------|------|------|------------------------------------------------------------------------------|
| Steel recycling                   | 175  | 164  | 86   | Recycling of Steel from metal components                                     |
| Steel recycling                   | 64   | 68   | 68   | Recycling of Steel from ASR metal fraction                                   |
| Alluminium recycling              | 113  | 244  | 0.3  | Recycling of Alluminium from metal components                                |
| Alluminium recycling              | 17   | 6    | 39   | Recycling of Alluminium from shredding                                       |
| Nickel recycling                  | 0.02 | 0.01 | 3.6  | Recycling of Nickel from shredding                                           |
| Lead recycling                    | 11   | 11   | 11   | Recycling of Lead from shredding                                             |
| Copper recycling                  | 24   | 18   | 75   | Recycling of Copper from shredding                                           |
| Plastics and elastomers recycling | 92   | 84   | 99   | Recycling of plastics and elastomers from dismantling and plastic components |
| Plastics and elastomers recycling | 151  | 135  | 198  | Recycling of plastics and elastomers from ASR polymeric fraction             |
| Lead in Lead acid battery         | 15   | 15   | 15   | Treatment of Lead in Lead Acid battery                                       |
| Li-ion NMC battery                | 0    | 0    | 452  | Treatment of Li-ion NMC battery                                              |
| Inert waste material landfill     | 110  | 125  | 104  | Landfill of plastic components and 35% of ASR non identified fraction        |
| Incineration of waste             | 201  | 229  | 187  | Incineration of non-ferrous materials and 65% of ASR non identified fraction |
| Electric and electronic equipment | 3.4  | 2.3  | 153  | Treatment of electric and electronics equipment                              |
| Tires recycling                   | 38   | 38   | 38   | Recycling of tires                                                           |
| Tires incineration                | 18   | 18   | 18   | Incineration of tires                                                        |
| Clinker production from waste oil | 1    | 1    | 0.82 |                                                                              |
| Wastewater treatment              | 0.01 | 0.01 | 0.01 |                                                                              |
| Exhaust system                    | 4.5  | 4.5  | -    |                                                                              |
| Platinum/Rhodium/Palladium        | 0.03 | 0.06 | -    |                                                                              |
| Glass recycling                   | 56   | 55   | 40   |                                                                              |
| Treatment of mixed metals         | 0.2  | 0.1  | 0.4  |                                                                              |
| Magnesium recycling               | 1    | 1    | 1    |                                                                              |

**Disclaimer/Publisher's Note:** The statements, opinions and data contained in all publications are solely those of the individual author(s) and contributor(s) and not of MDPI and/or the editor(s). MDPI and/or the editor(s) disclaim responsibility for any injury to people or property resulting from any ideas, methods, instructions or products referred to in the content.
